# Supplementary material for: High Level of Nonsynonymous Changes in Common Bean Suggests That Selection under Domestication Increased Functional Diversity at Target Traits
Source: Front Plant Sci. 2017 Jan 6;7:2005. doi: 10.3389/fpls.2016.02005 (PMC5216878; doi:10.3389/fpls.2016.02005)
Supplement: Supplementary file 13 [file Table13.xlsx]

## Sheet: TableS
Table S13. Correspondence between the loci used in the present study and those present in the common bean reference transcriptome from Bellucci et al. (2014).
	BLASTN analysis		Locus position in the reference trascriptome$
Locus	E-value	% Identity	Contig name	Chromosome	Start	End	contig	MESO Polymorphism	AEC	nH_ALL	nH_MESO	He_ALL	He_MESO	V_ALL	V_MESO	TajD_ALL	TajD_MESO	FS_ALL	FS_MESO	Pi_ALL	Pi_MESO	p_FSALL	p_FSMESO	p_TajDALL	p_TajDMESO	thetaS_ALL	thetaS_MESO	contig	nH_WM+we	nH_DM	He_WM+we	He_DM	V_WM+we	V_DM	TajD_WM+we	TajD_DM	FS_WM+we	FS_DM	Pi_WM+we	Pi_DM	phiST_DM_WM+we	REY_WM+we_DM	p_phiST_WM+we-DM	p_FS_WM+we	p_FS_DM	p_TajD_WM+we	p_TajD_DM	thetaS_WM+we	thetaS_DM
AN-Pv2	0	1	Ref_220_comp2959	Chr06	24415341	24417702	Ref_220_comp2959_c0	npD - pW		7	7	0.742857	0.686275	14	14	-0.0760266	-1.08611	0.865377	-0.338684	3.80952	2.89542	0.695	0.439	0.526	0.124	3.89133	4.0703	Ref_220_comp2959_c0	7	1	0.911111	0	14	0	-0.24054	0	-0.892006	0	4.68889	0	0.157559	0.17145	0.07129	0.261	N,A,	0.387	1	4.9488	0
AN-Pv4	8e-139	1	Ref_259_comp5785	Chr09	19841974	19845092	Ref_259_comp5785_c0	pD - pW		3	3	0.528571	0.568627	2	2	0.0248614	0.138114	0.0449187	0.0997414	0.561905	0.614379	0.445	0.411	0.618	0.647	0.5559	0.58147	Ref_259_comp5785_c0	3	2	0.6	0.25	2	1	0.120301	-1.05482	-0.100592	-0.181966	0.733333	0.25	0.253172	0.29192	0.0625	0.354	0.197	0.662	0.203	0.70697	0.38567
AN-Pv5	9e-139	1	Ref_080R_comp2287	Chr07	41326968	41332537	Ref_080R_comp2287_c0	pD - pW		4	3	0.595238	0.464052	7	2	-0.369686	-0.328216	1.42781	-0.278241	1.72381	0.503268	0.79	0.288	0.383	0.379	1.94567	0.58147	Ref_080R_comp2287_c0	3	2	0.622222	0.25	2	1	0.0188908	-1.05482	-0.156119	-0.181966	0.711111	0.25	-0.0234675	0	0.58301	0.338	0.204	0.638	0.2	0.70697	0.38567
AN-Pv8	0	1	Ref_259_comp26992	Chr04	5743242	5744975	Ref_259_comp26992_c0	npD - pW		2	2	0.180952	0.20915	2	2	-0.80383	-0.684821	0.859939	1.01308	0.361905	0.418301	0.48	0.549	0.234	0.258	0.5559	0.58147	Ref_259_comp26992_c0	2	1	0.355556	0	2	0	0.0188908	0	1.52347	0	0.711111	0	0.0804598	0.08388	0.4502	0.736	N,A,	0.654	1	0.70697	0
AN-Pv17	2e-32	0.87	Ref_080R_comp8744	Chr07	48047654	48051408	Ref_080R_comp8744_c0	npD - pW		2	2	0.0952381	0.111111	1	1	-1.16356	-1.16467	-0.918898	-0.794265	0.0952381	0.111111	0.069	0.1	0.136	0.148	0.27795	0.29074	Ref_080R_comp8744_c0	2	1	0.2	0	1	0	-1.11173	0	-0.339314	0	0.2	0	-0.0241821	0	0.99902	0.151	N,A,	0.201	1	0.35349	0
AN-Pv22	3e-49	1	Ref_259_comp6369	Chr02	36948937	36949382	Ref_259_comp6369_c0	pD - npW		2	2	0.32381	0.366013	1	1	0.292029	0.488095	0.683968	0.796056	0.32381	0.366013	0.45	0.486	0.775	0.794	0.27795	0.29074	Ref_259_comp6369_c0	1	2	0	0.571429	0	1	0	1.44416	0	0.966444	0	0.571429	0.470199	0.63525	0.01855	N,A,	0.585	1	0.957	0	0.38567
AN-Pv26.1	2e-109	1	Ref_259_comp564	Chr01	51462100	51463244
AN-Pv28	4e-44	1	Ref_25_comp580	Chr08	3206356	3211577	Ref_25_comp580_c0	pD - pW		11	9	0.904762	0.875817	38	33	0.748018	0.949524	1.7403	2.50171	12.5714	11.8497	0.762	0.879	0.834	0.852	10.5622	9.59427	Ref_25_comp580_c0	8	3	0.933333	0.678571	32	26	-0.14207	1.16827	-0.104013	7.44789	10.9778	12.25	0.0496819	0.05096	0.18457	0.423	0.996	0.47	0.908	11.3115	10.0275
AN-Pv30	2e-111	0.99	Ref_25_comp8475	Chr02	48900222	48904207	Ref_25_comp8475_c0	pD - pW		11	8	0.904762	0.869281	40	34	0.181025	0.673044	1.44269	3.51894	11.6286	11.5294	0.721	0.925	0.615	0.805	11.1181	9.88501	Ref_25_comp8475_c0	6	5	0.844444	0.785714	29	26	0.433427	-0.558922	2.44777	2.12088	11.1778	8.96429	0.198255	0.22096	0.02637	0.881	0.83	0.715	0.311	10.2511	10.0275
AN-Pv32	5e-47	1	Ref_080R_comp8171	Chr02	45229961	45231965	Ref_080R_comp8171_c0	pD - pW		5	5	0.690476	0.614379	6	6	1.14602	0.901844	1.143	0.801688	2.27619	2.22222	0.763	0.686	0.895	0.821	1.66771	1.74441	Ref_080R_comp8171_c0	5	2	0.8	0.25	6	2	1.4113	-1.31009	0.199785	0.761782	2.84444	0.5	0.297886	0.35366	0.02246	0.545	0.531	0.924	0.106	2.12091	0.77135
AN-Pv47	8e-173	0.99	Ref_080R_comp4539	Chr11	33170462	33172552	Ref_080R_comp4539_c0	pD - pW		6	6	0.757143	0.764706	19	19	-1.51363	-1.40164	1.15597	1.16363	3.14286	3.52941	0.74	0.74	0.052	0.086	5.28109	5.52397	Ref_080R_comp4539_c0	5	3	0.844444	0.607143	18	4	-1.24447	1.09121	1.38995	1.49337	4.66667	1.92857	0.0323635	0.0329	0.23828	0.756	0.812	0.123	0.834	6.36274	1.5427
AN-Pv51	5e-172	1	Ref_25_comp1548	Chr08	3314451	3321458	Ref_25_comp1548_c0	pD - pW		6	5	0.804762	0.751634	13	11	0.326691	0.601969	1.92643	2.42381	3.94286	3.72549	0.818	0.876	0.659	0.749	3.61338	3.19809	Ref_25_comp1548_c0	5	2	0.822222	0.428571	11	7	-0.0249628	0.529287	0.921959	4.77912	3.86667	3	0.115444	0.12267	0.11133	0.686	0.977	0.513	0.724	3.88834	2.69972
AN-Pv54	6e-132	0.88	Ref_259_comp21	Chr07	4237100	4237616	Ref_259_comp21_c0	npD - pW		2	2	0.0952381	0.111111	2	2	-1.51414	-1.50776	-0.0699503	0.0703997	0.190476	0.222222	0.209	0.256	0.043	0.039	0.5559	0.58147	Ref_259_comp21_c0	2	1	0.2	0	2	0	-1.40085	0	0.586219	0	0.4	0	-0.0241821	0	0.99902	0.433	N,A,	0.026	1	0.70697	0
AN-Pv55	0	1	Ref_259_comp159	Chr11	12853755	12857053	Ref_259_comp159_c0	npD - pW		5	3	0.490476	0.30719	4	2	-1.0189	-1.09629	-1.9325	-1.09614	0.714286	0.320261	0.03	0.058	0.178	0.192	1.11181	0.58147	Ref_259_comp159_c0	3	1	0.511111	0	2	0	-0.69098	0	-0.593814	0	0.555556	0	0.0453461	0.04641	0.48047	0.115	N,A,	0.218	1	0.70697	0
AN-Pv57	4e-124	0.99	Ref_220_comp68	Chr11	6378799	6381925
AN-Pv63	0	0.99	Ref_220_comp2156	Chr01	36431442	36433433	Ref_220_comp2156_c0	npD - pW		2	2	0.180952	0.20915	1	1	-0.617717	-0.528993	-0.136973	-0.0105838	0.180952	0.20915	0.187	0.243	0.226	0.27	0.27795	0.29074	Ref_220_comp2156_c0	2	1	0.355556	0	1	0	0.014992	0	0.4167	0	0.355556	0	0.0804598	0.08388	0.47949	0.38	N,A,	0.717	1	0.35349	0
AN-Pv66	6e-143	1	Ref_080R_comp4487	Chr07	15057811	15058897	Ref_080R_comp4487_c0	pD - pW		4	4	0.271429	0.313725	6	6	-2.06477	-2.0342	-1.21963	-1.02793	0.571429	0.666667	0.11	0.119	0.004	0.007	1.66771	1.74441	Ref_080R_comp4487_c0	3	2	0.377778	0.25	5	1	-1.7411	-1.05482	0.477271	-0.181966	1	0.25	-0.0150487	0	0.86133	0.576	0.205	0.012	0.197	1.76743	0.38567
AN-Pv68	0	0.99	Ref_080R_comp7480	Chr06	20742267	20743433	Ref_080R_comp7480_c0	npD - pW		3	3	0.338095	0.385621	4	4	-1.4583	-1.38107	-0.0216803	0.140595	0.542857	0.627451	0.383	0.431	0.069	0.071	1.11181	1.16294	Ref_080R_comp7480_c0	3	1	0.6	0	4	0	-0.942971	0	0.602811	0	1.06667	0	0.0804598	0.08388	0.21289	0.6	N,A,	0.201	1	1.41394	0
AN-Pv69	5e-147	1	Ref_259_comp14324	Chr02	40885482	40888040	Ref_259_comp14324_c0	npD - pW		3	2	0.566667	0.522876	9	8	2.42026	2.77503	6.94808	8.97987	4.28571	4.18301	0.988	0.997	0.992	1	2.50157	2.32588	Ref_259_comp14324_c0	2	1	0.355556	0	8	0	0.0252623	0	5.18801	0	2.84444	0	0.755352	1.40793	0	0.98	N,A,	0.516	1	2.82789	0
AN-PvCO	0	0.99	Ref_080R_comp941	Chr09	13477978	13479796	Ref_080R_comp941_c0	pD - pW		9	7	0.838095	0.784314	15	5	-0.522835	-0.589361	-1.0056	-3.17332	3.57143	1.18301	0.318	0.01	0.339	0.283	4.16928	1.45368	Ref_080R_comp941_c0	4	4	0.777778	0.75	3	3	0.548828	-0.812455	-0.458546	-1.38724	1.22222	0.928571	0.135002	0.14503	0.08887	0.279	0.041	0.738	0.252	1.06046	1.15702
AN-DNAJ	0	0.99	Ref_220_comp2794	Chr02	42412622	42413322	Ref_220_comp2794_c0	pD - pW		3	3	0.338095	0.385621	3	3	-0.706701	-0.549509	0.204241	0.354667	0.609524	0.699346	0.444	0.514	0.249	0.28	0.83386	0.87221	Ref_220_comp2794_c0	2	2	0.466667	0.25	2	1	1.03299	-1.05482	2.05186	-0.181966	0.933333	0.25	0.163792	0.17888	0.14453	0.816	0.187	0.865	0.184	0.70697	0.38567
g510	0	1	Ref_259_comp30431	Chr01	52015564	52016391	Ref_259_comp30431_c0	npD - pW		3	2	0.266667	0.111111	2	2	-0.488138	-1.50776	-0.425541	0.0703997	0.438095	0.222222	0.267	0.259	0.312	0.046	0.5559	0.58147	Ref_259_comp30431_c0	2	1	0.2	0	2	0	-1.40085	0	0.586219	0	0.4	0	-0.0241821	0	0.99902	0.412	N,A,	0.035	1	0.70697	0
Leg100	4e-24	1	Ref_080R_comp5514	Chr11	1843831	1847845	Ref_080R_comp5514_c0	pD - pW		9	9	0.895238	0.895425	29	29	0.624579	0.105666	2.37591	1.34121	9.3619	8.65359	0.862	0.717	0.792	0.59	8.06062	8.43133	Ref_080R_comp5514_c0	8	3	0.955556	0.678571	28	11	-0.251411	1.98491	-0.450406	4.58972	9.37778	5.92857	0.160198	0.17459	0.0332	0.357	0.971	0.417	0.99	9.8976	4.24242
Leg133	7e-129	1	Ref_220_comp1981	Chr11	4095847	4100278	Ref_220_comp1981_c0	pD - pW		7	7	0.619048	0.69281	21	21	-0.941207	-0.700569	1.33198	1.33073	4.38095	5.01307	0.733	0.76	0.176	0.287	5.837	6.10545	Ref_220_comp1981_c0	6	2	0.888889	0.25	20	1	0.470808	-1.05482	1.46761	-0.181966	7.77778	0.25	0.183993	0.20333	0.04004	0.75	0.208	0.716	0.22	7.06972	0.38567
Leg223	9e-75	1	Ref_25_comp4672	Chr09	34241987	34245569	Ref_25_comp4672_c0	npD - pW		9	6	0.766667	0.679739	11	7	0.0868774	0.562582	-1.45124	0.00900966	3.13333	2.37255	0.215	0.495	0.592	0.728	3.05748	2.03515	Ref_25_comp4672_c0	6	1	0.888889	0	7	0	0.138919	0	-1.20673	0	2.55556	0	0.554372	0.80827	0.00195	0.181	N,A,	0.586	1	2.4744	0
$ Contigs in Bellucci et al. (2014), along with the sequences in the TAIR 10 protein database of Arabidopsis thaliana using BLASTX with an E-value <10E-2
¤ Contigs aligned against the NR NCBI protein database using BLASTX with an E-value ≤10E-3 (this study).
[truncated: 59 more columns]
